# Supplementary material for: Large polarization of push–pull “Cruciforms”viacoordination with lanthanide ions
Source: Royal Society of Chemistry journal article supplement (doi:10.1039/d1nj04358g), 2021-11-29
Supplement: d1nj04358g1.pdf [file d1nj04358g1.pdf]

# Large Polarization of Push-Pull “Cruciforms” via Coordination with Lanthanide Ions

*Sara Benedini,<sup>a</sup> Yeting Zheng,<sup>b</sup> Andrea Nitti,<sup>a</sup> Mercedes M. Mazza,<sup>b</sup> Daniele Dondi,<sup>a</sup> Francisco M.*

*Raymo<sup>b</sup> and Dario Pasini<sup>\*a</sup>*

<sup>a</sup> Department of Chemistry and INSTM Research Unit, University of Pavia, Via Taramelli 12, 27100  
Pavia, Italy

<sup>b</sup> Laboratory for Molecular Photonics, Department of Chemistry, University of Miami, 1301  
Memorial Drive, Coral Gables, Florida 33146-0431 – USA

Email: [dario.pasini@unipv.it](mailto:dario.pasini@unipv.it)

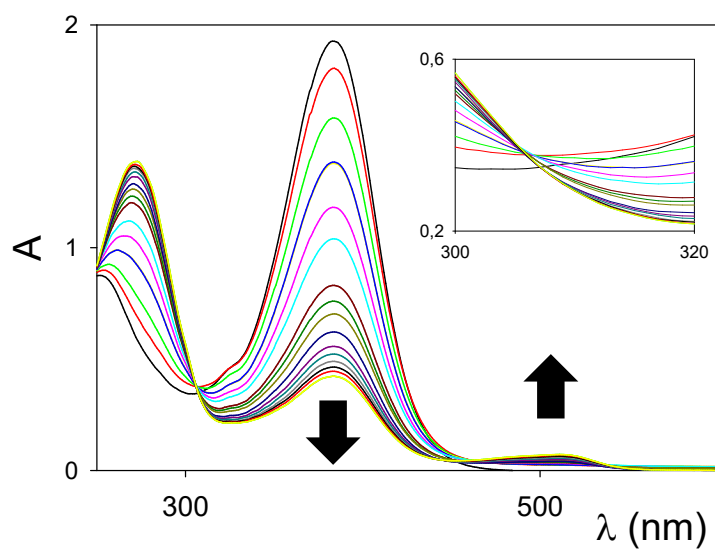

**Figure S1.** UV/VIS titration (MeCN, 298 K) of **1b** ( $10^{-5}$  M) with  $\text{Sc}(\text{OTf})_3$ .

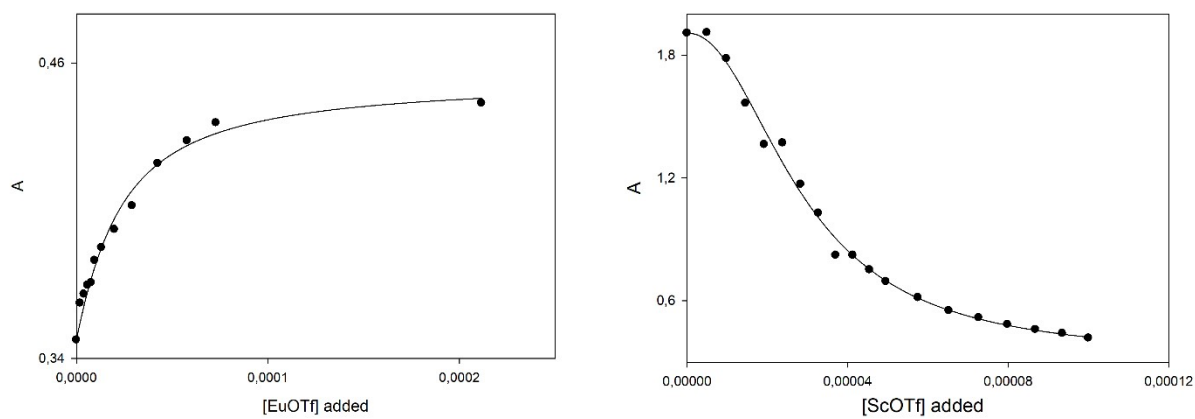

**Figure S2.** UV/VIS titration profiles and best fitting for titration of **1b** with  $\text{Eu}(\text{OTf})_3$  (left, fitting for a 1:1 binding) and  $\text{Sc}(\text{OTf})_3$  (right, fitting with the Hill equation).

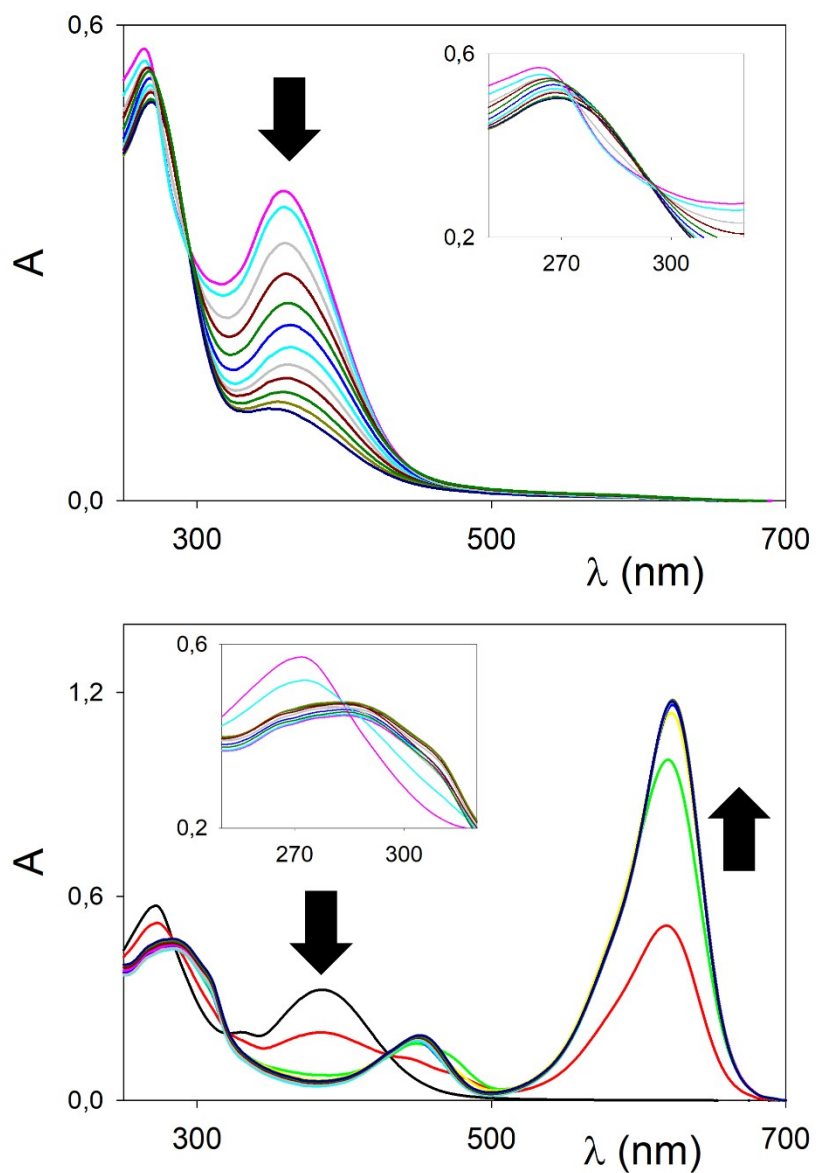

**Figure S3.** UV/VIS titration (MeCN, 298 K) of **2a** (top,  $10^{-5}$  M) and **2b** (bottom,  $10^{-5}$  M) with  $\text{Sc}(\text{OTf})_3$ .

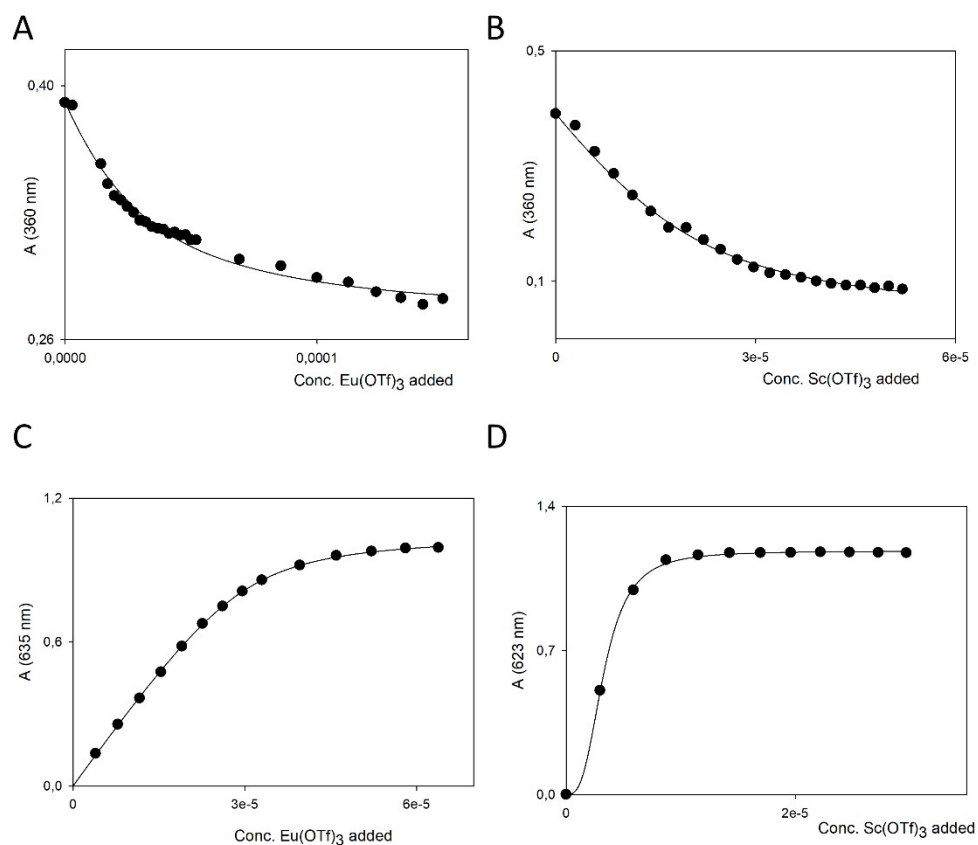

**Figure S4.** UV/VIS titration profiles and best fitting for titration of **2a** and **2b** with  $\text{Eu}(\text{OTf})_3$  (A and C) and  $\text{Sc}(\text{OTf})_3$  (B and D).

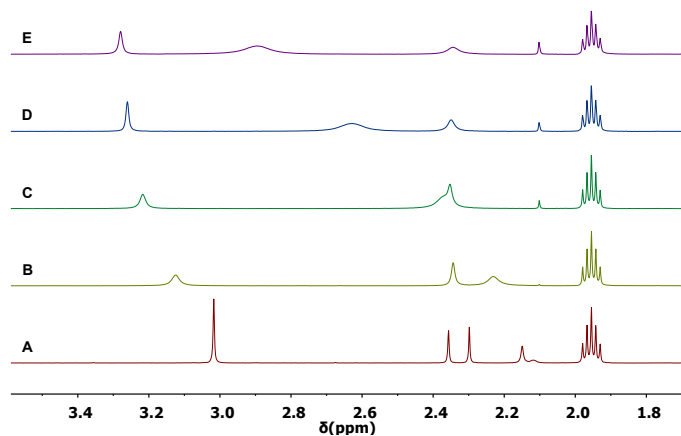

**Figure S5.** Partial  $^1\text{H}$  NMR spectra (300 MHz, 298 K) of: (A) ligand **1b** (0,005 M in  $\text{CD}_3\text{CN}$ ); (B) **1b** with 0,3 equivalents; (C) 0,6 equivalents; (D) 0,9 equivalents; (E) 1,1 equivalents of  $\text{Sc}(\text{OTf})_3$

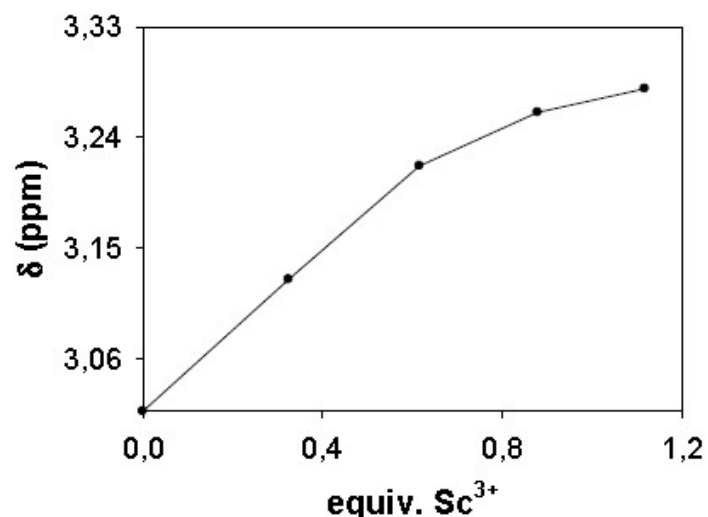

**Figure S6.** <sup>1</sup>H NMR titration profile for the proton resonances of the dimethylamino groups in the titration of chromophore **1b**.

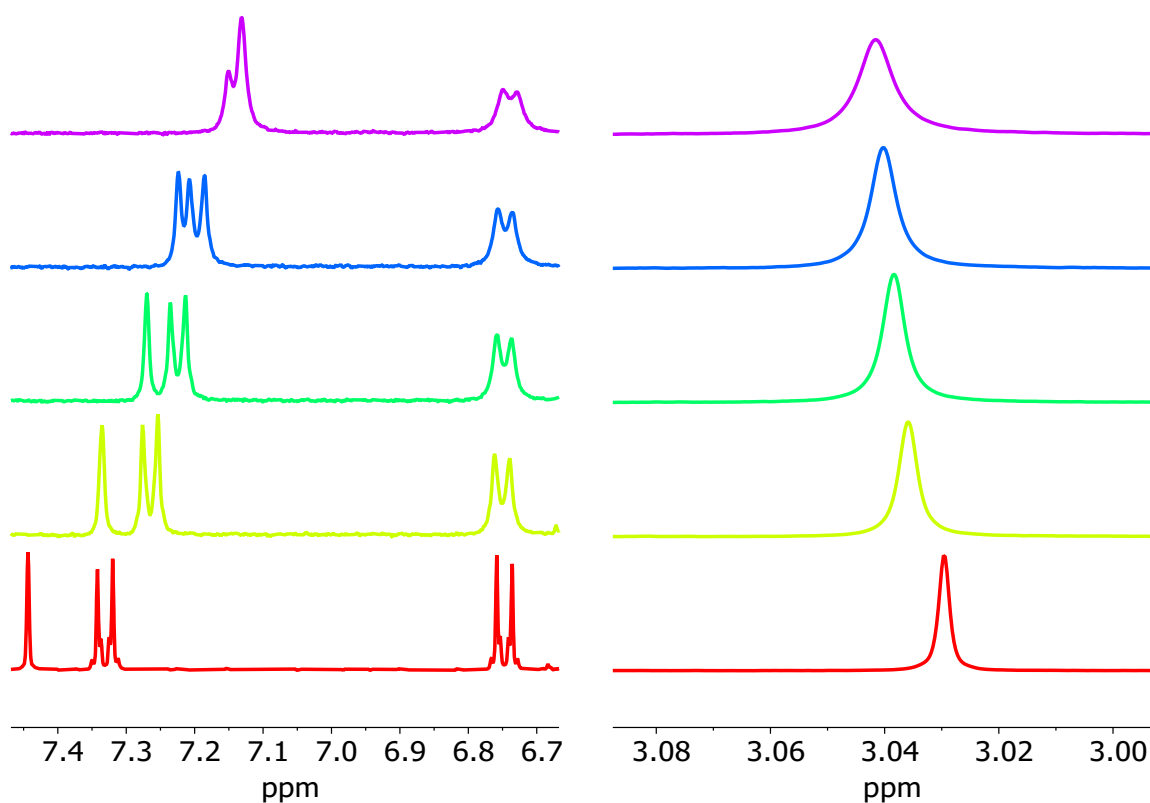

**Figure S7.** Partial <sup>1</sup>H NMR spectra (400 MHz, 298 K) of (from bottom to top): (red trace) ligand **1b** (0.0054 M in CD<sub>3</sub>CN); (yellow trace) **1b** with 0.14 equivalents of Eu(OTf)<sub>3</sub>; (green trace) 0.23 equivalents; (blue trace) 0.31 equivalents; (violet trace) 0.53 equivalents of Eu(OTf)<sub>3</sub>

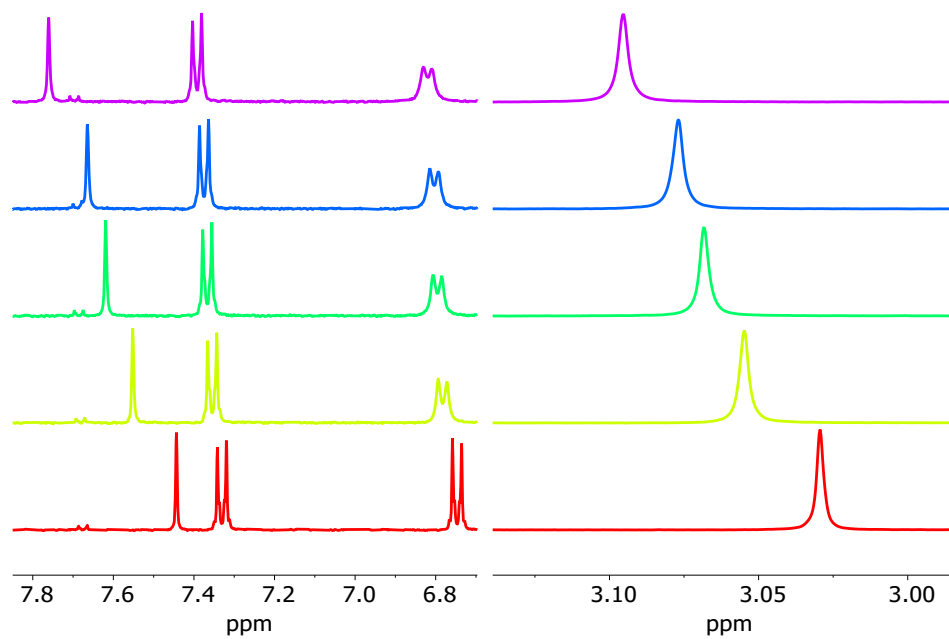

**Figure S8.** Partial <sup>1</sup>H NMR spectra (400 MHz, 298 K) of (from bottom to top): (red trace) ligand **1b** (0.0054 M in CD<sub>3</sub>CN); (yellow trace) with 0.24 equivalents of Y(OTf)<sub>3</sub>; (green trace) 0.42 equivalents; (blue trace) 0.57 equivalents; (violet trace) 0.95 equivalents of Y(OTf)<sub>3</sub>

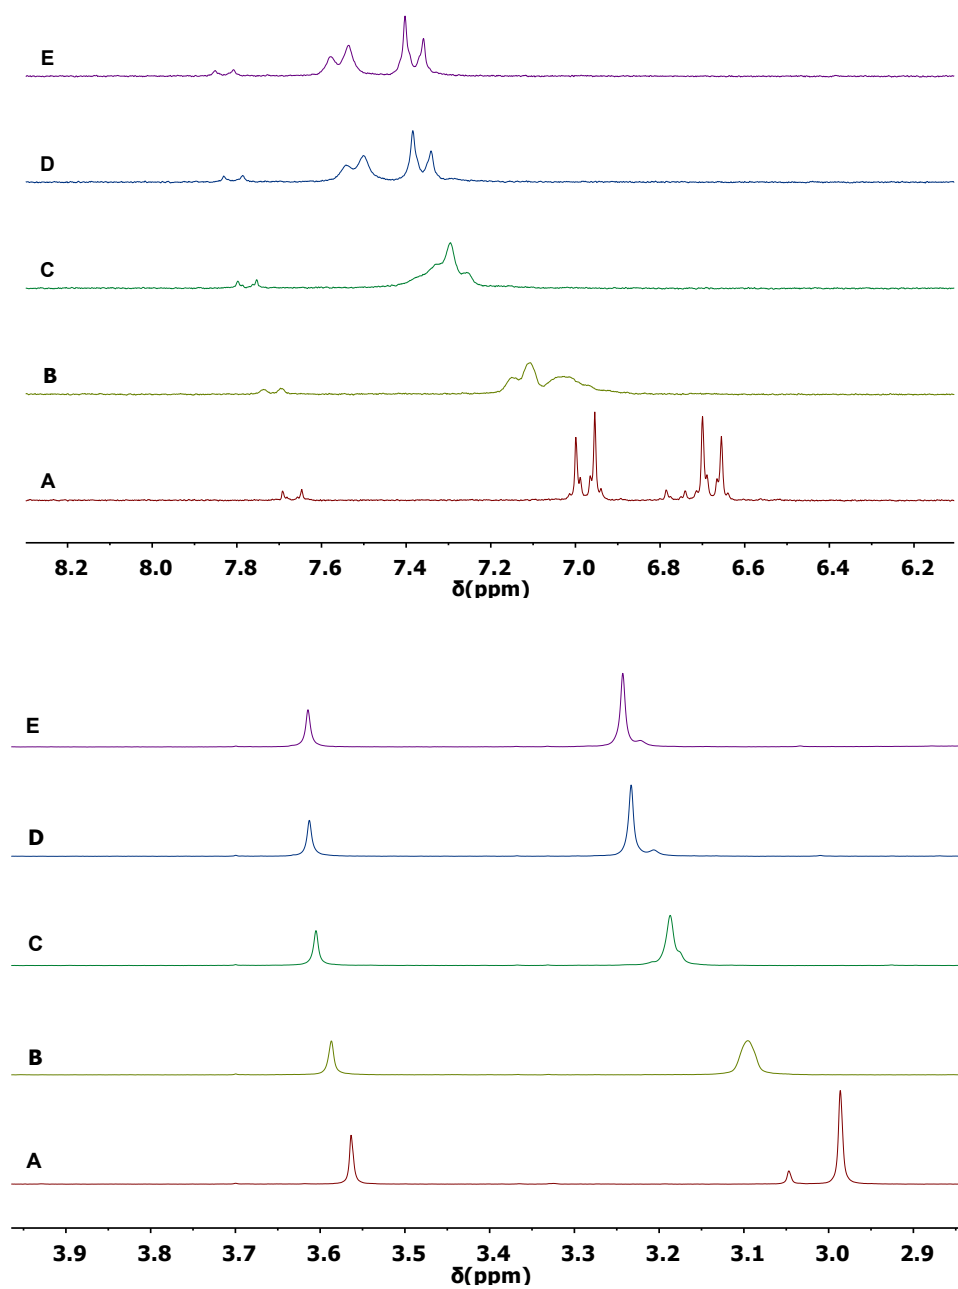

**Figure S9.** Partial  $^1\text{H}$  NMR spectra (300 MHz, 298 K) of: (A) ligand **2a** (0.005 M in  $\text{CD}_3\text{CN}$ ); (B) **2a** with 0.4 equivalents; (C) 0.7 equivalents; (D) 0.9 equivalents; (E) 1.2 equivalents of  $\text{Sc}(\text{OTf})_3$

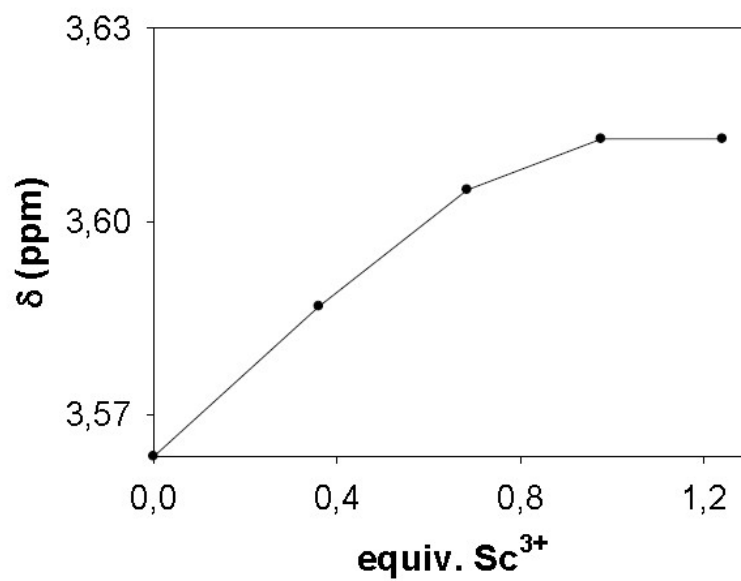

**Figure S10.**  $^1\text{H}$  NMR titration profile for the proton resonances of the dimethylamino groups in the titration of chromophore **2a**.



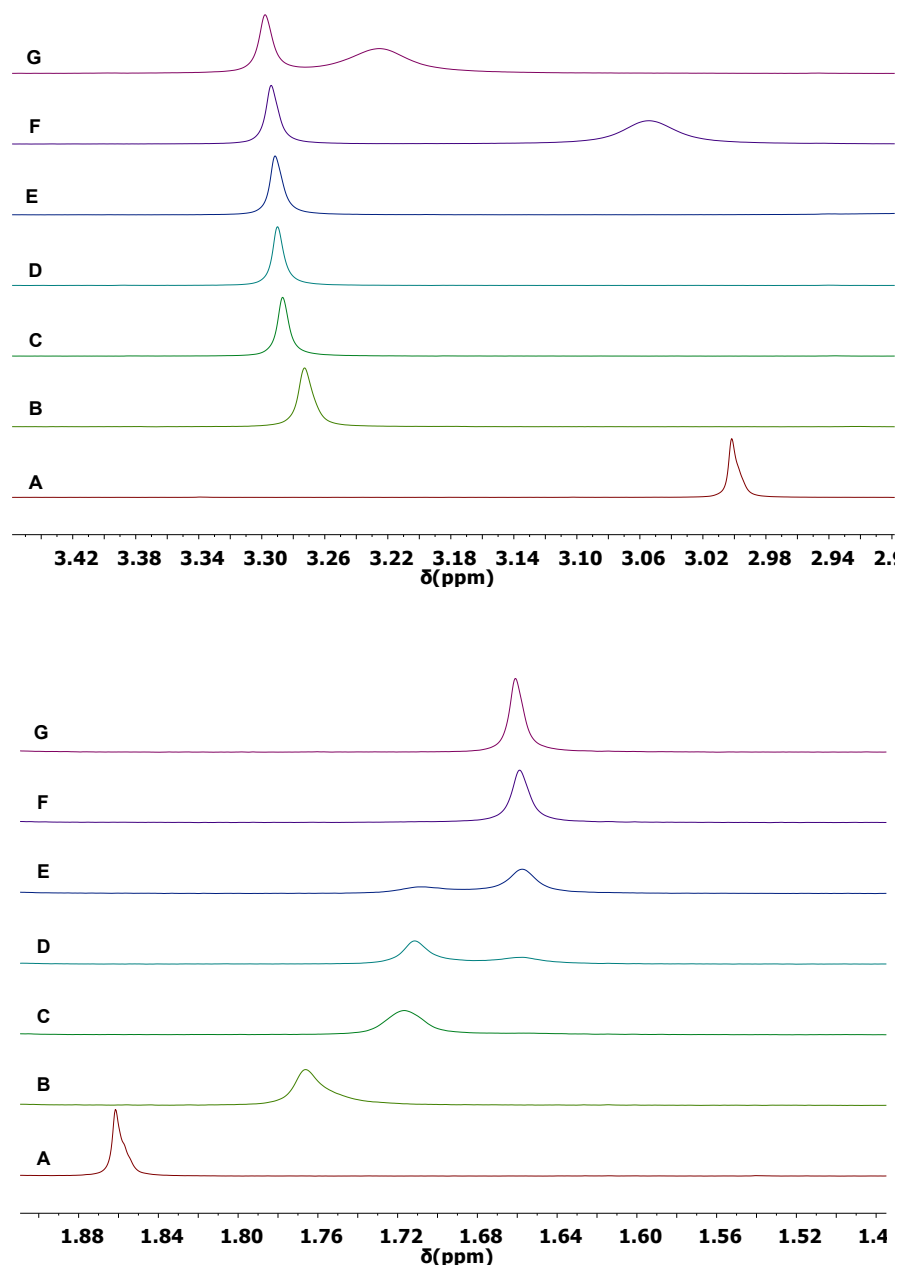

**Figure S11.** Partial  $^1\text{H}$  NMR spectra (300 MHz, 298 K) of (A) ligand **2b** (0.005 M in  $\text{CD}_3\text{CN}$ ); (B) **2b** with 0.3 equivalents; (C) 0.5 equivalents; (D) 0.6 equivalents; (E) 0.9 equivalents; (F) 1.1 equivalents; (G) 1.3 equivalents of  $\text{Sc}(\text{OTf})_3$

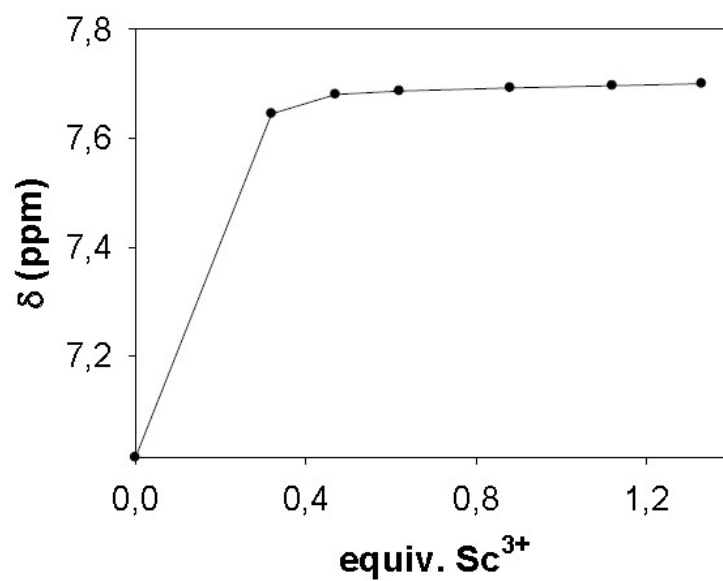

**Figure S12.**  $^1\text{H}$  NMR titration profile for the proton resonances of the aromatic  $\text{H}_\text{B}$  proton resonances in the titration of chromophore **2b**.

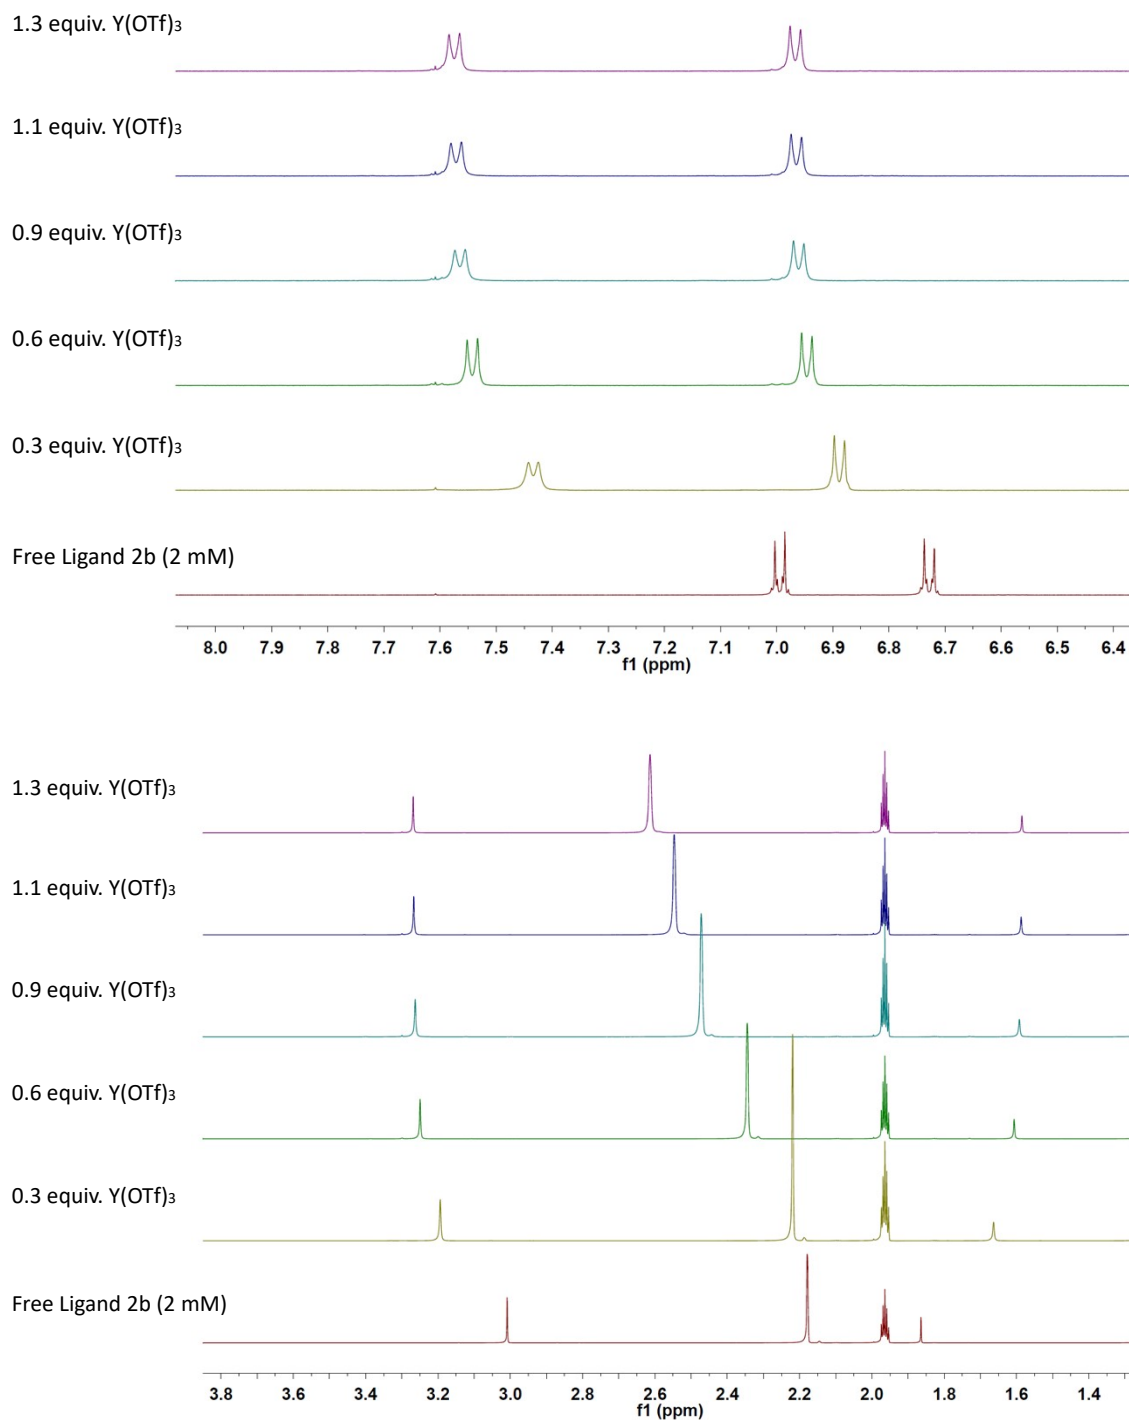

**Figure S13.** Partial  $^1\text{H}$  NMR spectra (500 MHz, 298 K) of (A) ligand **2b** (0.002 M in  $\text{CD}_3\text{CN}$ ); (B) **2b** with 0.3 equivalents; (C) 0.5 equivalents; (D) 0.6 equivalents; (E) 0.9 equivalents; (F) 1.1 equivalents; (G) 1.3 equivalents of  $\text{Sc}(\text{OTf})_3$

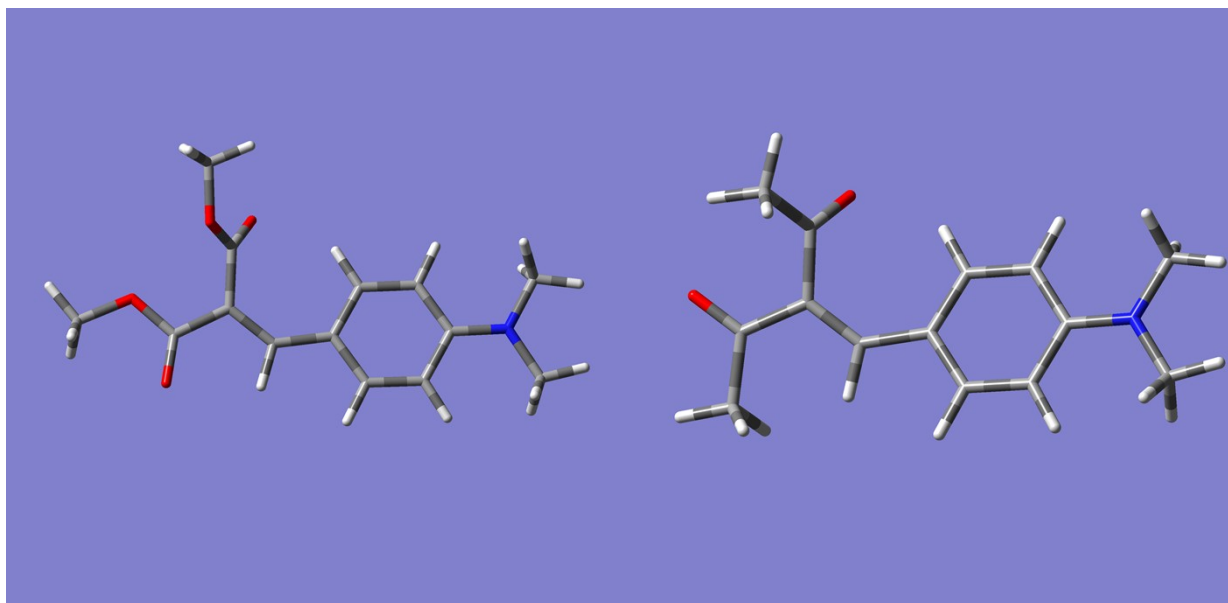

**Figure S14.** Minimized molecular structures for **1a** (left) and **1b** (right).

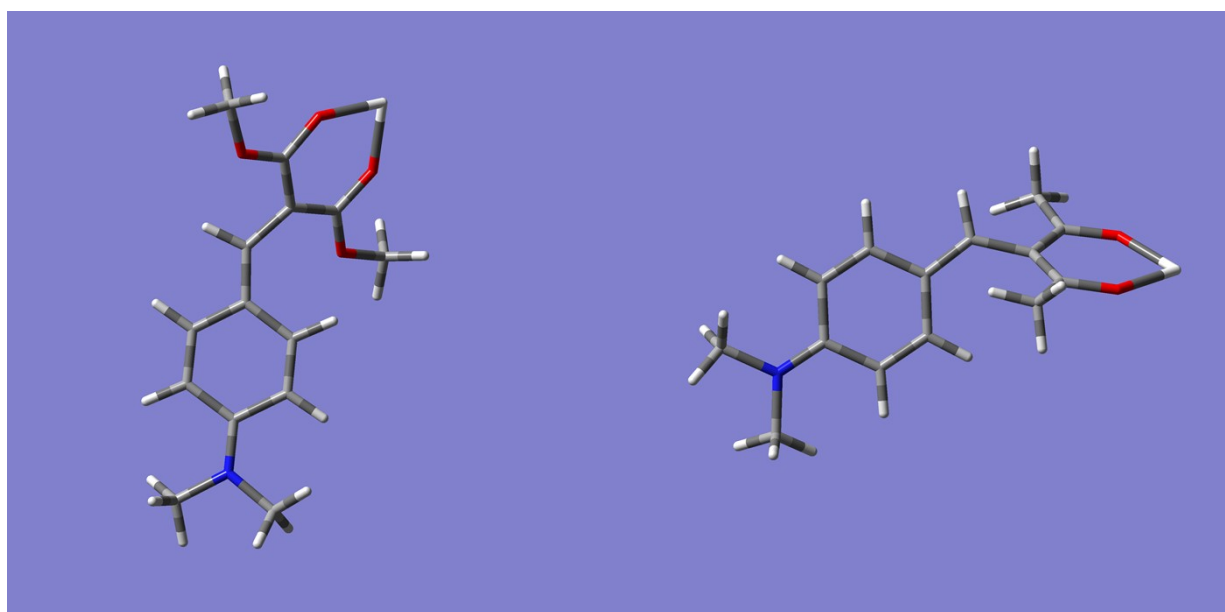

**Figure S15.** Minimized molecular structures for Minimized molecular structures for 1:1 complexes with scandium of ligands **1a** (left) and **1b** (right).

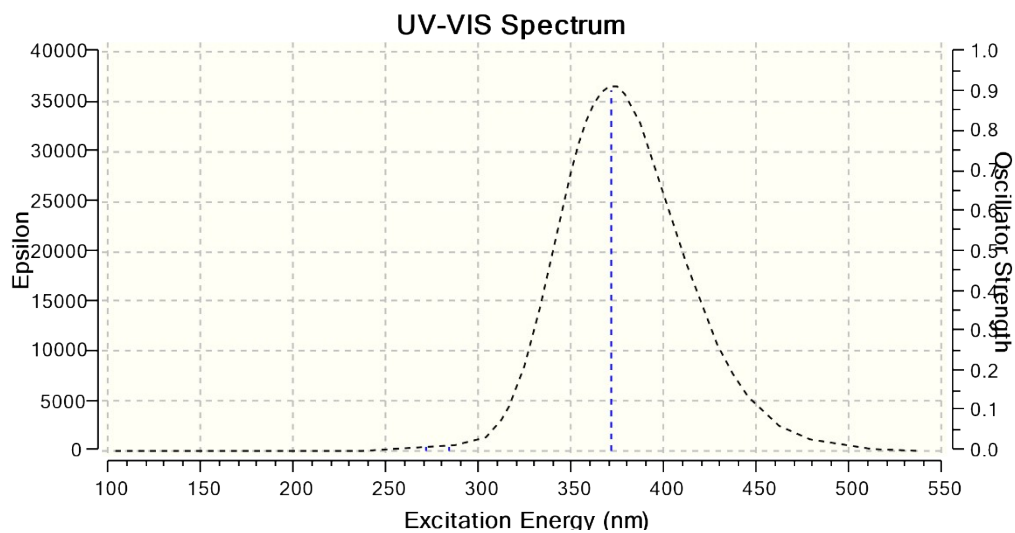

Figure S16. Calculated UV-Vis spectrum of 1a.

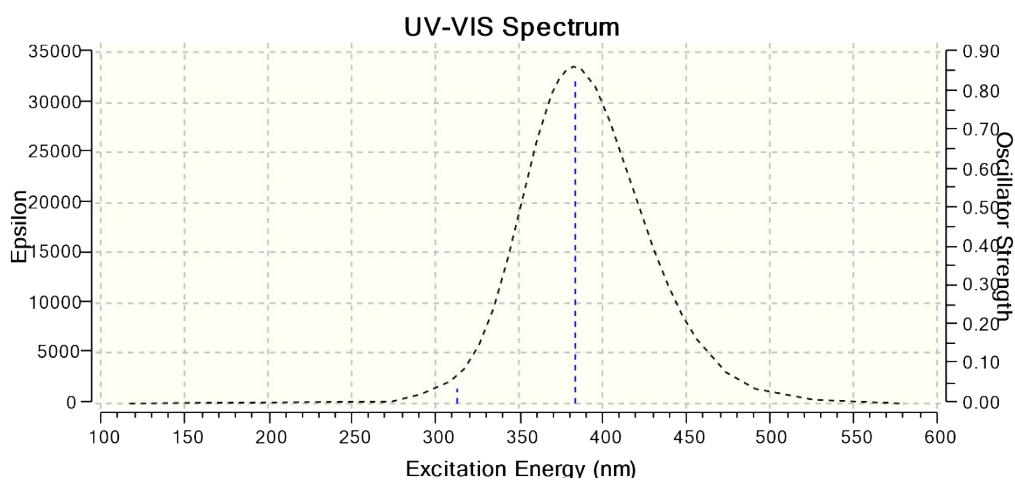

Figure S17. Calculated UV-Vis spectrum of 1b.

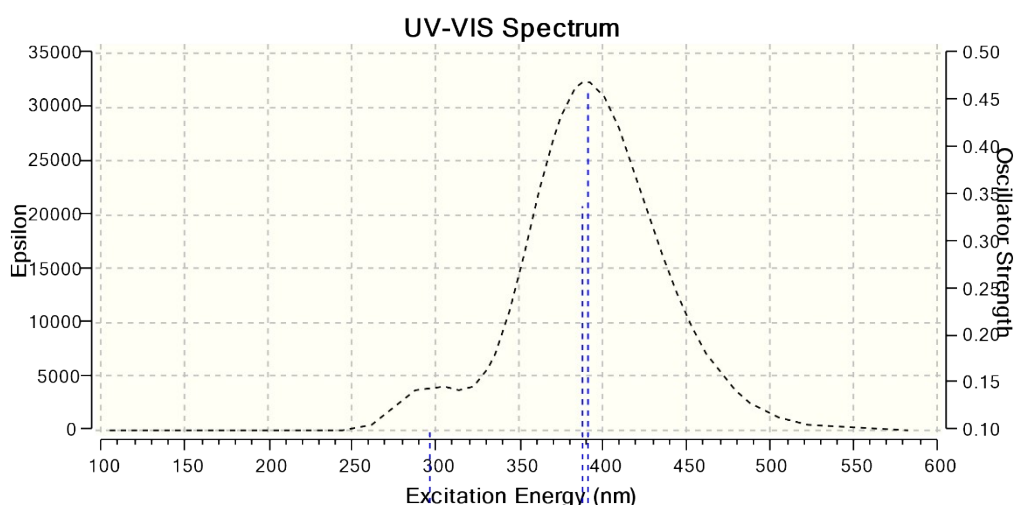

Figure S18. Calculated UV-Vis spectrum of 2a.

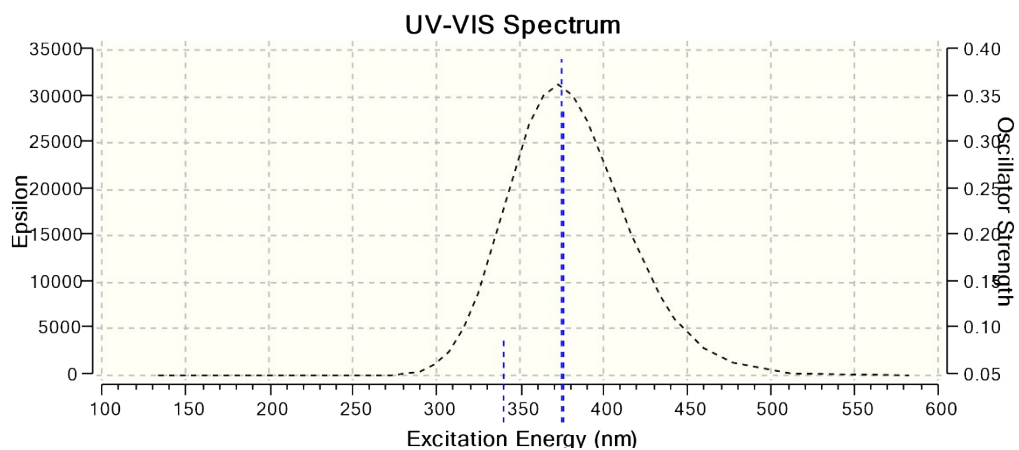

**Figure S19.** Calculated UV-Vis spectrum of **2b**.

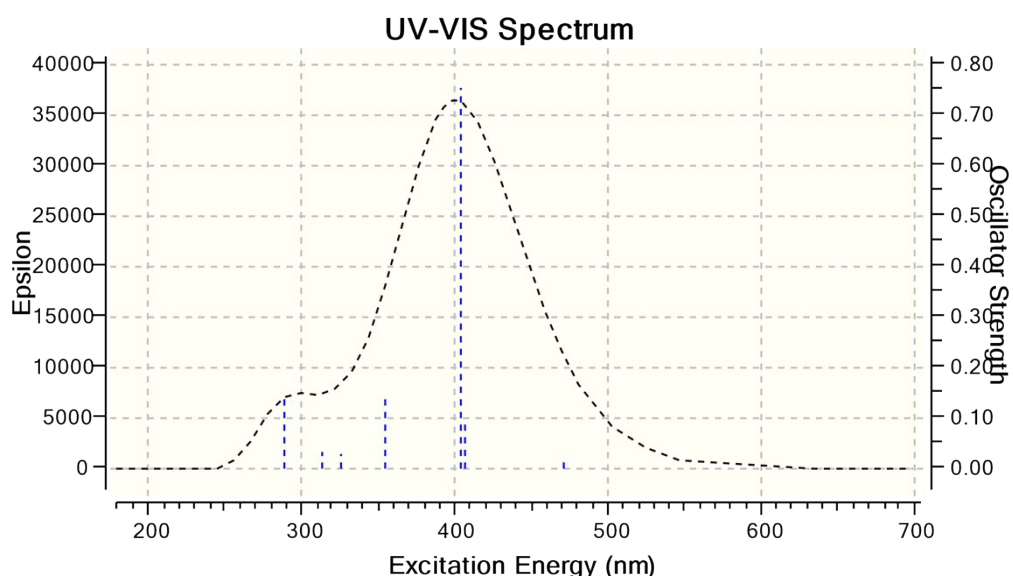

**Figure S20.** Calculated UV-Vis spectrum of complex of **1a** with scandium.

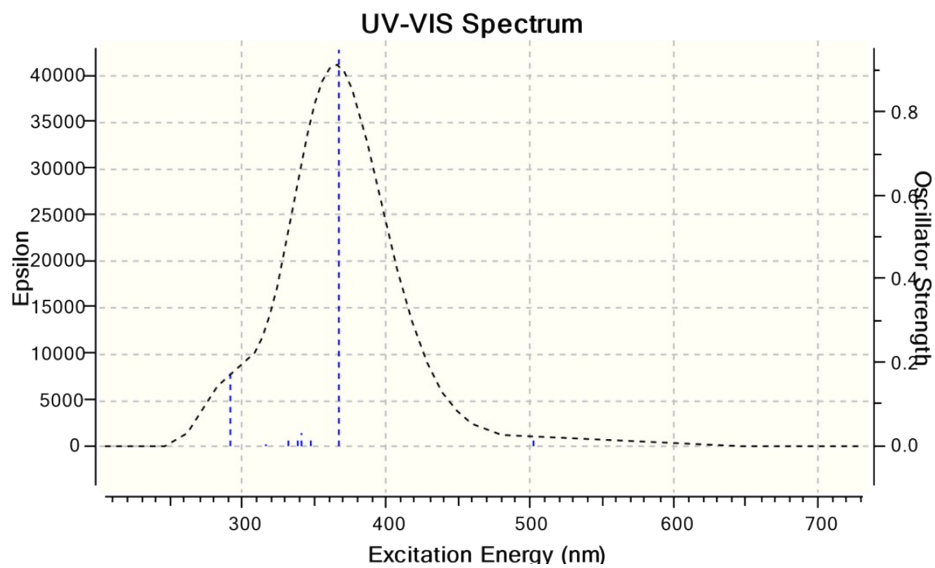

**Figure S21.** Calculated UV-Vis spectrum of complex of **1b** with scandium.

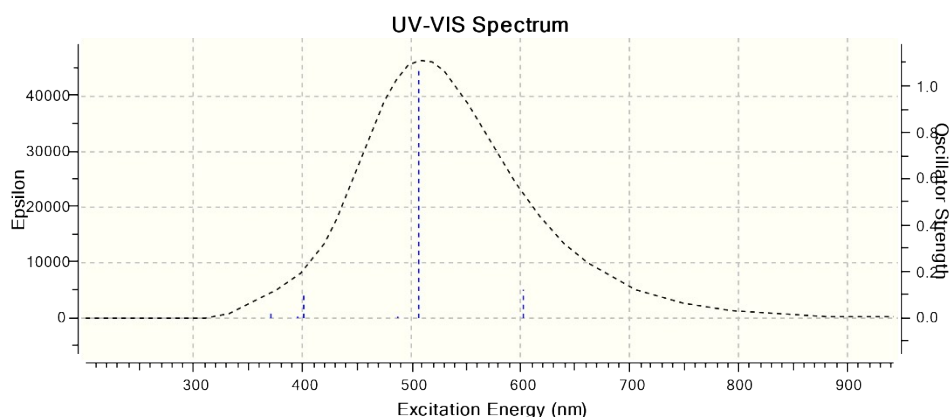

**Figure S22.** Calculated UV-Vis spectrum of complex of **2a** with scandium.

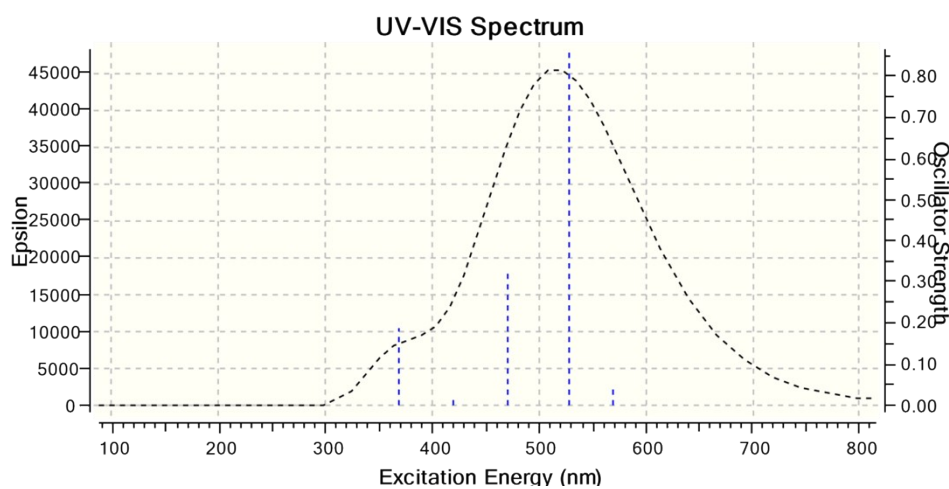

**Figure S23.** Calculated UV-Vis spectrum of complex of **2b** with scandium.

**Table S1.** UV-Vis transitions calculated for the scandium complexes in acetonitrile, considering only the two most intense.

| Compound name | Band position (nm) | Oscillator strength (a.u.) | Type of transition                          |
|---------------|--------------------|----------------------------|---------------------------------------------|
| <b>1a</b>     | 404                | 0.7546                     | $\pi(\text{HOMO}) \rightarrow \pi^*$        |
| <b>1a</b>     | 355                | 0.1425                     | $\pi(\text{HOMO}) \rightarrow \text{metal}$ |
| <b>1b</b>     | 367                | 0.9514                     | $\pi(\text{HOMO}) \rightarrow \pi^*$        |
| <b>1b</b>     | 293                | 0.1744                     | $\text{metal} \rightarrow \pi^*$            |
| <b>2a</b>     | 507                | 1.0835                     | $\pi(\text{HOMO}) \rightarrow \text{metal}$ |
| <b>2a</b>     | 602                | 0.1249                     | $\pi(\text{HOMO}) \rightarrow \pi^*$        |
| <b>2b</b>     | 529                | 0.86149                    | $\pi(\text{HOMO}) \rightarrow \pi^*$        |
| <b>2b</b>     | 471                | 0.3325                     | $\pi(\text{HOMO}) \rightarrow \text{metal}$ |

**Table S2.** Cartesian coordinates for the optimized complexes with Sc (III) (units are in Angstroms)

**1a**

|   |             |             |             |
|---|-------------|-------------|-------------|
| C | -2.17664200 | 1.40103700  | -0.97281900 |
| C | -3.49997200 | 1.18211700  | -0.78164100 |
| C | -3.95889400 | 0.13021300  | 0.10748500  |
| C | -2.93792200 | -0.67823500 | 0.76300100  |
| C | -1.61757400 | -0.47310100 | 0.53178000  |
| C | -1.14799100 | 0.58247900  | -0.34681800 |
| H | -1.86564400 | 2.21586300  | -1.62021400 |
| H | -4.21603600 | 1.83272800  | -1.26623900 |
| H | -3.23223300 | -1.47683300 | 1.43101400  |
| H | -0.89958500 | -1.09917400 | 1.04768900  |
| N | -5.25191800 | -0.07440800 | 0.31537800  |
| C | -5.78970400 | -1.01206500 | 1.32243800  |
| H | -6.68351400 | -0.55903800 | 1.75677300  |
| H | -6.07273200 | -1.95194400 | 0.83566400  |
| H | -5.07725400 | -1.19744800 | 2.12238000  |
| C | -6.30277400 | 0.63859300  | -0.44756600 |
| H | -6.50749300 | 1.60965200  | 0.01686400  |
| H | -6.00991800 | 0.76900000  | -1.48866800 |
| H | -7.21030900 | 0.03517100  | -0.41595600 |



|    |            |             |             |
|----|------------|-------------|-------------|
| C  | 0.16106500 | 0.92641400  | -0.58873400 |
| H  | 0.30427800 | 1.85163100  | -1.14216000 |
| C  | 1.43332500 | 0.30294100  | -0.20370800 |
| C  | 1.69981700 | -1.08597100 | -0.29832500 |
| O  | 2.91962700 | -1.58763300 | -0.05343500 |
| C  | 2.51301200 | 1.19227200  | 0.08747900  |
| O  | 0.77268300 | -1.90571100 | -0.65655200 |
| O  | 2.28529800 | 2.45507000  | 0.11675500  |
| C  | 1.02134500 | -3.34377600 | -0.88333700 |
| H  | 0.05478400 | -3.72999300 | -1.19748600 |
| H  | 1.76132100 | -3.45662600 | -1.67641500 |
| H  | 1.34676800 | -3.80428900 | 0.05010700  |
| C  | 3.33182300 | 3.46963700  | 0.37767700  |
| H  | 3.74992900 | 3.29652700  | 1.36962300  |
| H  | 4.08649600 | 3.40893300  | -0.40707900 |
| H  | 2.79380000 | 4.41358400  | 0.33585100  |
| O  | 3.75531400 | 0.76444000  | 0.33511400  |
| Sc | 4.58113900 | -0.89721600 | 0.38590800  |

### 1b

|   |             |             |             |
|---|-------------|-------------|-------------|
| C | -2.02899700 | 1.40496000  | 0.97710400  |
| C | -3.33393900 | 1.08443500  | 0.74244400  |
| C | -3.69011700 | -0.04969600 | -0.11282300 |
| C | -2.58452400 | -0.82548100 | -0.69315600 |
| C | -1.28159200 | -0.51051600 | -0.43225900 |
| C | -0.91630000 | 0.62610400  | 0.41766600  |
| H | -1.79863800 | 2.26472400  | 1.60188600  |
| H | -4.11316900 | 1.70061300  | 1.17404800  |
| H | -2.80141800 | -1.67534300 | -1.32863300 |
| H | -0.49981500 | -1.10689100 | -0.89549200 |
| N | -4.96995600 | -0.35383400 | -0.35411700 |
| C | -5.41899000 | -1.41117600 | -1.30837100 |
| H | -6.30468800 | -1.04185900 | -1.83280900 |
| H | -4.65834200 | -1.64611100 | -2.05083100 |
| H | -5.69573900 | -2.31470900 | -0.75116800 |
| C | -6.10269300 | 0.35783700  | 0.32159400  |
| H | -5.89361800 | 0.51287000  | 1.38197500  |
| H | -6.29186000 | 1.31887000  | -0.17226200 |
| H | -6.99785600 | -0.25980600 | 0.23581000  |
| C | 0.37220500  | 1.03672600  | 0.69256800  |
| H | 0.48010700  | 1.95878900  | 1.26506300  |
| C | 1.67327800  | 0.42111900  | 0.30223100  |
| C | 2.04833200  | -0.89340900 | 0.71449900  |
| O | 3.29794200  | -1.35296200 | 0.37840900  |
| C | 2.62018200  | 1.27687000  | -0.36437600 |
| O | 3.87020800  | 0.80802800  | -0.63188000 |
| C | 1.25680900  | -1.84480300 | 1.53600500  |
| H | 0.31677800  | -1.42228100 | 1.88709500  |
| H | 1.05675100  | -2.76679700 | 0.96666100  |
| H | 1.85701700  | -2.16652200 | 2.40123100  |
| C | 2.36235900  | 2.67692000  | -0.78407400 |
| H | 1.31786800  | 2.83282700  | -1.07180000 |
| H | 2.56816800  | 3.36346900  | 0.05944200  |

|    |            |             |             |
|----|------------|-------------|-------------|
| H  | 3.03322300 | 2.97434600  | -1.59606000 |
| Sc | 4.85779300 | -0.75186800 | -0.42009000 |

**2a**

|   |             |             |             |
|---|-------------|-------------|-------------|
| C | 1.44307700  | -2.03006700 | 0.47280900  |
| C | 2.65103700  | -2.69016700 | 0.40788600  |
| C | 3.80684200  | -2.07716600 | -0.21373300 |
| C | 3.64793100  | -0.72275800 | -0.70719000 |
| C | 2.43711600  | -0.07019400 | -0.61232200 |
| C | 1.26289100  | -0.69764800 | -0.05756700 |
| H | 0.62484300  | -2.50162500 | 1.00719700  |
| H | 2.74123300  | -3.66453100 | 0.87319800  |
| H | 4.47784800  | -0.22584300 | -1.19546400 |
| H | 2.35719300  | 0.92740900  | -1.03643200 |
| N | 4.98790800  | -2.73499900 | -0.31641900 |
| C | 6.21818700  | -2.07060400 | -0.82189200 |
| H | 7.08689900  | -2.65585400 | -0.51682200 |
| H | 6.20667300  | -2.01337500 | -1.91825100 |
| H | 6.32441900  | -1.06683400 | -0.40180300 |
| C | 5.12325400  | -4.16718300 | 0.06252000  |
| H | 5.23865000  | -4.27343700 | 1.14921800  |
| H | 4.25883000  | -4.74527800 | -0.27378200 |
| H | 6.01134500  | -4.57793700 | -0.42036000 |
| C | 0.00001100  | -0.02143300 | 0.00008300  |
| C | 0.00001000  | 1.48595400  | 0.00003000  |
| C | 0.57465100  | 2.20651100  | 1.08460100  |
| O | 0.61419500  | 3.56206900  | 1.11078800  |
| C | -0.57464100 | 2.20642700  | -1.08459400 |
| O | -0.61422500 | 3.56198200  | -1.11087800 |
| C | -1.26286700 | -0.69764900 | 0.05770200  |
| C | -2.43712600 | -0.07018000 | 0.61237200  |
| C | -1.44302600 | -2.03008000 | -0.47265600 |
| C | -3.64794600 | -0.72273900 | 0.70718800  |
| H | -2.35722900 | 0.92743700  | 1.03645400  |
| C | -2.65098900 | -2.69017800 | -0.40778400 |
| H | -0.62476500 | -2.50164500 | -1.00699700 |
| C | -3.80683000 | -2.07716000 | 0.21375400  |
| H | -4.47789100 | -0.22581100 | 1.19540000  |
| H | -2.74116500 | -3.66454900 | -0.87308700 |
| N | -4.98790400 | -2.73498700 | 0.31638100  |
| C | -5.12323600 | -4.16718800 | -0.06250100 |
| H | -4.25879600 | -4.74525600 | 0.27380100  |
| H | -6.01130900 | -4.57793600 | 0.42042000  |
| H | -5.23866100 | -4.27348400 | -1.14919200 |
| C | -6.21822900 | -2.07057800 | 0.82172300  |
| H | -6.20685900 | -2.01340800 | 1.91808700  |
| H | -6.32437300 | -1.06678300 | 0.40167300  |
| H | -7.08691700 | -2.65578500 | 0.51650400  |
| O | -1.07095500 | 1.54631400  | -2.11275800 |
| O | 1.07097200  | 1.54648600  | 2.11281700  |
| C | 1.67650700  | 2.22319400  | 3.31365800  |
| H | 1.98098800  | 1.39307700  | 3.94819300  |
| H | 2.53365200  | 2.82032900  | 2.99456200  |

|    |             |            |             |
|----|-------------|------------|-------------|
| H  | 0.91374700  | 2.83606800 | 3.79945500  |
| C  | -1.67654500 | 2.22291900 | -3.31362600 |
| H  | -1.98111500 | 1.39274700 | -3.94804800 |
| H  | -2.53363400 | 2.82014000 | -2.99454100 |
| H  | -0.91378500 | 2.83569500 | -3.79954700 |
| Sc | -0.00001000 | 4.97235100 | -0.00010000 |

**2b**

|   |             |             |             |
|---|-------------|-------------|-------------|
| C | 1.44156600  | -1.87024500 | 0.50924300  |
| C | 2.66038600  | -2.51010900 | 0.50203700  |
| C | 3.84358500  | -1.87019900 | -0.04411700 |
| C | 3.68984200  | -0.51066100 | -0.52775800 |
| C | 2.46666800  | 0.12206800  | -0.49356200 |
| C | 1.26949100  | -0.52819500 | -0.00807000 |
| H | 0.60382800  | -2.36551000 | 0.98938800  |
| H | 2.73940600  | -3.48970100 | 0.95856300  |
| H | 4.53708700  | 0.00585000  | -0.96282900 |
| H | 2.39708200  | 1.12340100  | -0.90900800 |
| N | 5.03570800  | -2.50784800 | -0.08639600 |
| C | 6.28912500  | -1.81844500 | -0.49676900 |
| H | 7.14139700  | -2.37966300 | -0.10996600 |
| H | 6.36772000  | -1.77839400 | -1.59104100 |
| H | 6.33647400  | -0.80760000 | -0.08471000 |
| C | 5.18006800  | -3.94697000 | 0.26739500  |
| H | 5.30135600  | -4.06831200 | 1.35175300  |
| H | 4.32076600  | -4.52645000 | -0.07674500 |
| H | 6.07054100  | -4.34108400 | -0.22593400 |
| C | -0.00001900 | 0.13745700  | 0.00001000  |
| C | 0.00008600  | 1.64746100  | 0.00002500  |
| C | 0.47369900  | 2.33752600  | 1.15494900  |
| O | 0.45435300  | 3.70718300  | 1.15867200  |
| C | -0.47343600 | 2.33762700  | -1.15491800 |
| O | -0.45364900 | 3.70719700  | -1.15872600 |
| C | 0.96969200  | 1.73977600  | 2.43227900  |
| H | 0.49982600  | 2.24729900  | 3.28454800  |
| H | 0.78453300  | 0.66710000  | 2.49285900  |
| H | 2.05243600  | 1.90837800  | 2.53439800  |
| C | -0.96992000 | 1.73985900  | -2.43205700 |
| H | -0.50093300 | 2.24781200  | -3.28453200 |
| H | -0.78421400 | 0.66728500  | -2.49293400 |
| H | -2.05285100 | 1.90778100  | -2.53338900 |
| C | -1.26960700 | -0.52804900 | 0.00806300  |
| C | -2.46669300 | 0.12233900  | 0.49359900  |
| C | -1.44184800 | -1.87005400 | -0.50930600 |
| C | -3.68994600 | -0.51024200 | 0.52778500  |
| H | -2.39697200 | 1.12364200  | 0.90909700  |
| C | -2.66074500 | -2.50977300 | -0.50210900 |
| H | -0.60417100 | -2.36540400 | -0.98947000 |
| C | -3.84385800 | -1.86974400 | 0.04408600  |
| H | -4.53711500 | 0.00634900  | 0.96290400  |
| H | -2.73988900 | -3.48934500 | -0.95865900 |
| N | -5.03603800 | -2.50728900 | 0.08638300  |
| C | -5.18051100 | -3.94638600 | -0.26745400 |

|    |             |             |             |
|----|-------------|-------------|-------------|
| H  | -4.32124200 | -4.52593700 | 0.07665300  |
| H  | -6.07100500 | -4.34045400 | 0.22587400  |
| H  | -5.30182100 | -4.06768200 | -1.35181400 |
| C  | -6.28939600 | -1.81781700 | 0.49682500  |
| H  | -6.36795800 | -1.77781900 | 1.59110200  |
| H  | -6.33669100 | -0.80694900 | 0.08482000  |
| H  | -7.14171700 | -2.37895500 | 0.11001600  |
| Sc | 0.00054400  | 5.09199700  | -0.00007100 |
